# Supplementary material for: Structure-Guided Prediction of the Functional Impact of DCLK1 Mutations on Tumorigenesis
Source: MDPI journal article supplement (doi:10.3390/biomedicines11030990), 2023-03-22
Supplement: s1 [file s1]

## Carli *et al.* Supplementary Tables and Figures Index

|                                                                                                                                                                                                                                                                                                             |    |
|-------------------------------------------------------------------------------------------------------------------------------------------------------------------------------------------------------------------------------------------------------------------------------------------------------------|----|
| <b>Figure S1.</b> In silico prediction of proteins binding to the (A) N-terminal region, (B) DC-linker region, and (C) PEST linker region for isoforms 1 & 2 (top) and isoforms 3& 4 (bottom).....                                                                                                          | 2  |
| <b>Figure S2.</b> DCLK1 missense mutations in cancer. (A) The distribution of the 394 DCLK1 mutations and CNV gains and losses identified in the GDC data-set for each malignancy. (B) Lollipop figure showing frequency and position of the DCLK1 missense mutations identified within the GDC cohort..... | 3  |
| <b>Table S1.</b> Experimentally determined structures of the DC1 <b>and</b> DC2 domains from DCX and DCLK1 and the DCLK1 kinase domain.....                                                                                                                                                                 | 4  |
| <b>Table S2.</b> Functional residues of DCLK1 and their mutation frequency.....                                                                                                                                                                                                                             | 6  |
| <b>Table S3.</b> Predicted impact of point mutations on the structural stability of DCLK1.....                                                                                                                                                                                                              | 11 |
| <b>References</b> .....                                                                                                                                                                                                                                                                                     | 12 |

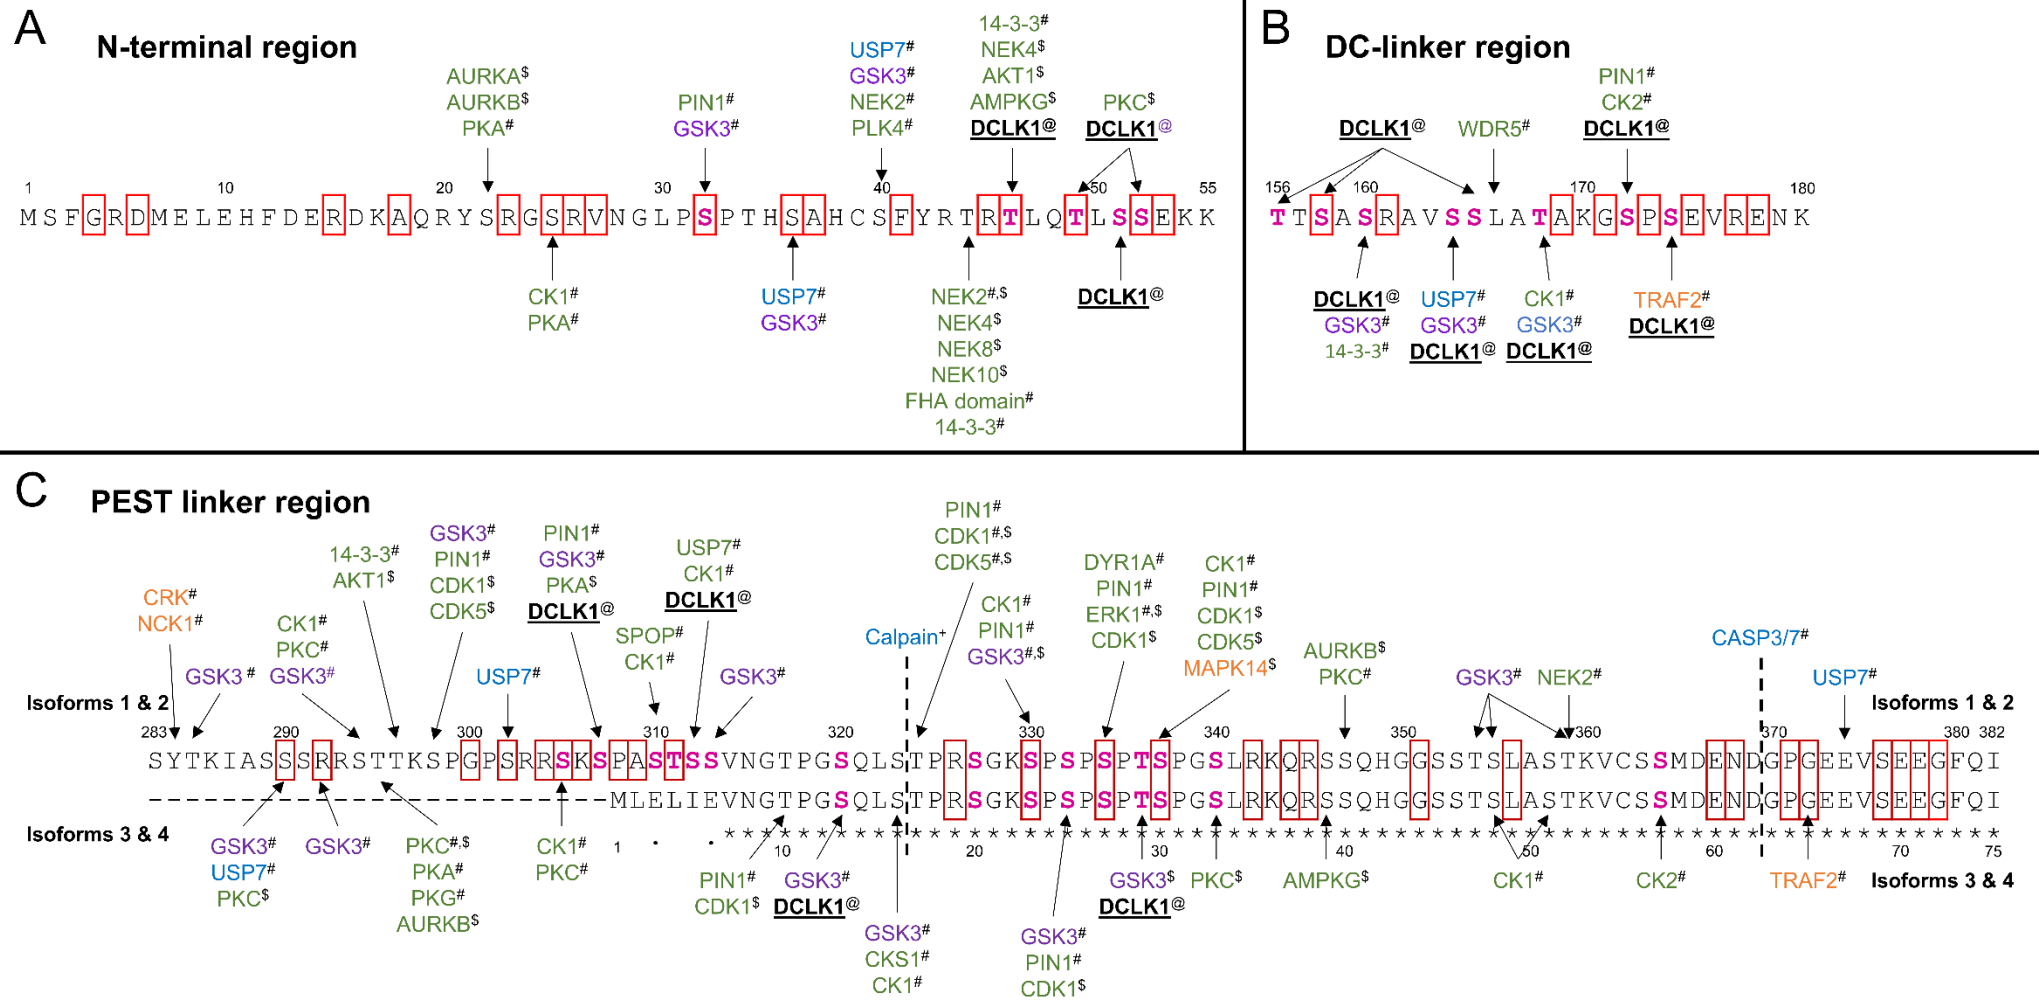

**Figure S1.** In silico prediction of proteins that interact with the (A) N-terminal region, (B) DC-linker region, and (C) PEST linker region for isoforms 1 & 2 (top) and isoforms 3 & 4 (bottom). Proteins are colored by function: protein degradation (blue), cell cycle processes (green), MAPK cascade (orange), and Wnt signalling (purple). Proteins were identified by Eukaryotic Linear Motif resource (ELM, #) [135], Scansite 4.0 (\$) [95], or DeepCalpain (+) software [120], or manually curated from the literature with DCLK1 autophosphorylation sites (@), phosphorylation sites (magenta), and identified mutations (red boxes) from supplementary Table S2.

A

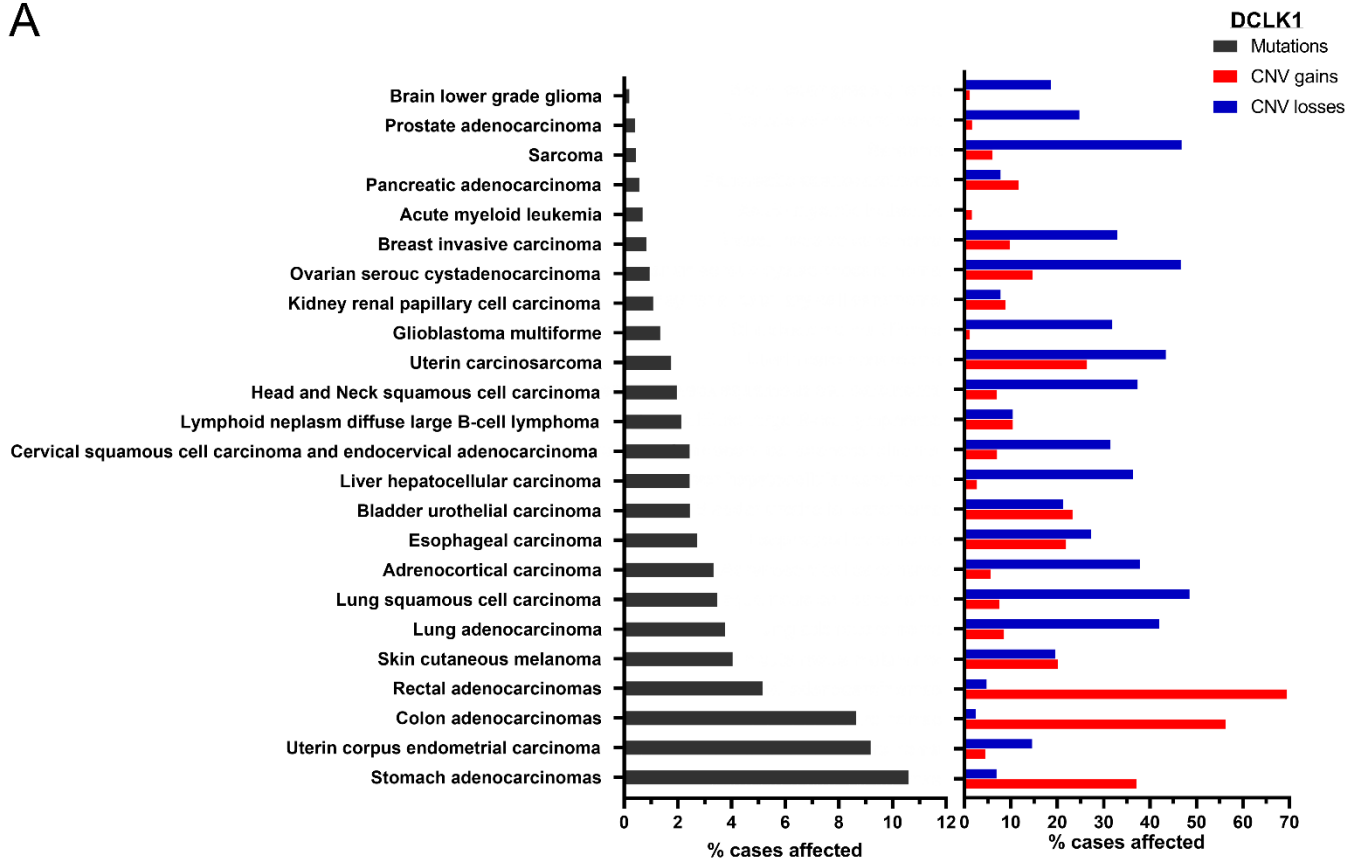

B

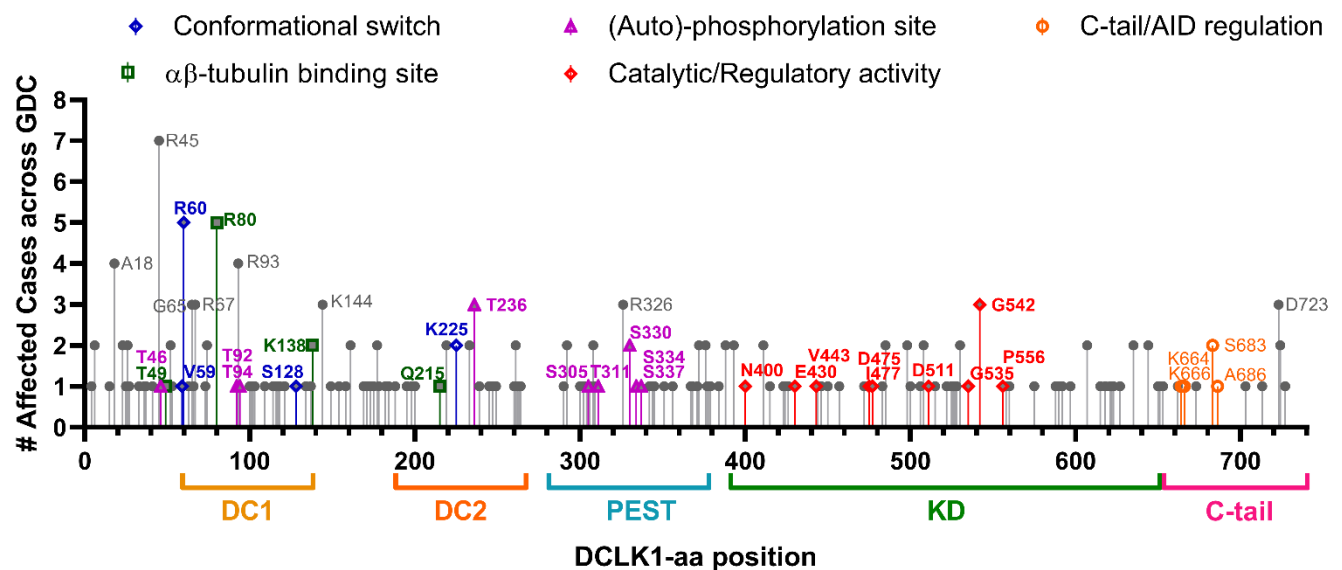

**Figure S2 DCLK1 missense mutations in cancer.** (A) The distribution of the 394 DCLK1 mutations and copy number variation (CNV) gains and losses identified in the genomic data commons (GDC) data-set for each malignancy. (B) Lollipop figure showing frequency and position of the DCLK1 missense mutations identified within the GDC cohort. Residues are only labelled if they coincide with a known functional residue, or with  $\geq 3$  incidences. With residues highlighted involved in the conformational switch (blue),  $\alpha\beta$ -tubulin isomeric binding (green), (auto)-phosphorylation (purple), catalytic/regulatory kinase activity motif (red), and C-regulatory tail/auto-inhibitory domain (AID) (orange).

**Table S1.** Experimentally determined structures of the DC1 and DC2 domains from DCX and DCLK1, and the DCLK1 kinase domain.

| Domain | Year | ID   | Method  | Res.    | Protein-Isoform                   | Conformation                                                               | Notes                                                       | Reference   |
|--------|------|------|---------|---------|-----------------------------------|----------------------------------------------------------------------------|-------------------------------------------------------------|-------------|
| DC1    | 2020 | 6REV | Cryo-EM | 3.8 Å   | DCX                               | C-tail disordered                                                          | Cryo-EM structure bound to 13-protofilament GDP-microtubule | [73]        |
| DC1    | 2020 | 6RFD | Cryo-EM | 3.9 Å   | DCX                               | C-tail disordered                                                          | Cryo-EM structure bound to 14-protofilament GDP-microtubule | [73]        |
| DC1    | 2020 | 6RF8 | Cryo-EM | 3.8 Å   | DCX                               | C-tail disordered                                                          | Cryo-EM structure bound to 13-protofilament GDP-microtubule | [136]       |
| DC1    | 2016 | 5IKC | X-ray   | 2.06 Å  | DCX                               | C-tail disordered                                                          | In complex with Fab 1/108                                   | [75]        |
| DC1    | 2016 | 5IN7 | X-ray   | 2.48 Å  | DCX                               | Closed                                                                     | K215D/K216D mutant                                          | [75]        |
| DC1    | 2016 | 5IOI | X-ray   | 2.4 Å   | DCX                               | Closed (chains C/F)<br>Open (chains A/E)<br>C-tail disordered (chains B/D) | K215D/K216D mutant                                          | [75]        |
| DC1    | 2016 | 5IO9 | X-ray   | 1.3 Å   | DCX                               | Closed                                                                     | K215D/K216D mutant                                          | [75]        |
| DC1    | 2006 | 2BQQ | X-ray   | 2.2 Å   | DCX                               | Open                                                                       | K215D/K216D mutant                                          | [85]        |
| DC1    | 2003 | 1UF0 | NMR     |         | DCLK1                             | Closed                                                                     |                                                             | Unpublished |
| DC1    | 2003 | 1MG4 | X-ray   | 1.504 Å | DCLK1                             | Closed                                                                     | Unlabelled protein.                                         | [80]        |
| DC1    | 2003 | 1MFW | X-ray   | 1.6 Å   | DCLK1                             | Closed                                                                     | Selenomethionine labelled protein                           | [80]        |
| DC1    | 2003 | 1MJD | NMR     |         | DCX                               | Closed                                                                     |                                                             | [80]        |
| DC2    | 2020 | 6RF2 | Cryo-EM | 4.2 Å   | DCX                               | Monomeric                                                                  | Cryo-EM structure bound to microtubules                     | [73]        |
| DC2    | 2018 | 6FNZ | X-ray   | 2.23 Å  | DCX                               | Domain-swapped dimer                                                       | Domain swapped dimer                                        | [86]        |
| DC2    | 2016 | 5IP4 | X-ray   | 1.81 Å  | DCX                               | Monomeric                                                                  | In complex with nanobody XA4451. Closed conformation        | [75]        |
| KD     | 2021 | 7KX8 | X-ray   | 3.1 Å   | DCLK1-1/3<br>Residues 372-686     | Active (Type 1)                                                            | DCLK1-Cter in complex with FMF-03-055-1                     | [54]        |
| KD     | 2021 | 7KXW | X-ray   | 3.002 Å | DCLK1-1/2/3/4<br>Residues 372-649 | Active (Type 1.5)                                                          | DCLK1-KD in complex with DCLK1-IN-1                         | [54]        |
| KD     | 2021 | 7KX6 | X-ray   | 2.5 Å   | DCLK1-1/2/3/4<br>Residues 372-649 | Active (Type 1)                                                            | DCLK1-KD in complex with XMD8-85                            | [54]        |
| KD     | 2021 | 7F3G | X-ray   | 2.1 Å   | DCLK1-1/2/3/4<br>Residues 372-649 | Active (Type 1)                                                            | DCLK1 kinase domain in complex with ruxolitinib             | [137]       |
| KD     | 2021 | 6KYQ | X-ray   | 2.141 Å | DCLK1-2/4<br>Residues 379-703     | Autoinhibited                                                              | DCLK1 Autoinhibited Kinase Domain                           | [51]        |
| KD     | 2021 | 6KYR | X-ray   | 2.206 Å | DCLK1-2/4<br>Residues 379-703     | Autoinhibited                                                              | DCLK1 mutant (P675L) Autoinhibited Kinase Domain            | [51]        |
| Domain | Year | ID   | Method  | Res.    | Protein-Isoform                   | Conformation                                                               | Notes                                                       | Reference   |
| KD     | 2016 | 5JZJ | X-ray   | 1.71 Å  | DCLK1-1/2/3/4<br>Residues 372-649 | Active (Type 1)                                                            | DCLK1-KD in complex with AMPPN                              | [53]        |
| KD     | 2016 | 5JZN | X-ray   | 2.85 Å  | DCLK1-1/2/3/4<br>Residues 372-649 | Active (Type 1)                                                            | DCLK1-KD in complex with NVP-TAE684                         | [53]        |

**Table S2.** Functional residues of DCLK1 and their mutation frequency. The proposed function(s) for each identified site in DCX and matched or identified site in DCLK1 are given, including: its mutation frequency according to NCI's GDC portal [115], the amino acid substitutions observed; and the domain in DCLK1 in which it is located. The identified function of the residue which is color coded according to Figure 4 with (auto)phosphorylation sites (magenta), isomeric MT binding sites (green), conformational switch (blue), catalytic/regulatory kinase activity (other colors).

| Identified DCX residue | Identified or matched DCLK1 residue | Mutation frequency | Substitution     | Domain | Function                                                                                              | Reference  |
|------------------------|-------------------------------------|--------------------|------------------|--------|-------------------------------------------------------------------------------------------------------|------------|
| S28                    | S32                                 |                    |                  |        | phosphorylation related actin/microtubule binding switch on DCX                                       | [70]       |
|                        |                                     |                    |                  |        | phosphorylated by CDK5 on DCX                                                                         | [89]       |
|                        | T46                                 | 1                  | T>M              |        | (Auto)phosphorylation site identified in mass spectrometry based experiment                           | [52,53,83] |
| Q44                    | Q48                                 |                    |                  |        | isomeric binding site of DC1 domain (of DCX) to $\alpha\beta$ -tubulin                                | [73]       |
| A45                    | T49                                 | 1                  | T>M              | DC1    | isomeric binding site of DC1 domain (of DCX) to $\alpha\beta$ -tubulin                                | [73]       |
|                        |                                     |                    |                  |        | (Auto)phosphorylation site identified in mass spectrometry based experiment                           | [83,52]    |
| S47                    | S51                                 |                    |                  | DC1    | phospho-site identified with mass spectrometry based (altered upon C-tail deletion or T668A mutation) | [52]       |
|                        |                                     |                    |                  |        | Phosphorylated by PKA and MARK on DCX                                                                 | [20]       |
|                        |                                     |                    |                  |        | Facilitates Kinesin-3 motor binding along microtubules                                                | [74]       |
|                        | S52                                 | 2                  | S>Y/C            | DC1    | Autophosphorylation site identified in mass spectrometry based experiment                             | [83]       |
| A52                    | A56                                 |                    |                  | DC1    | isomeric binding site of DC1 domain (of DCX) to $\alpha\beta$ -tubulin                                | [73]       |
| K54                    | K58                                 |                    |                  | DC1    | Isomeric binding site of tryptophan -> open DC state                                                  | [75,85,80] |
| V55                    | V59                                 | 1                  | V>A              | DC1    | Isomeric binding site of tryptophan -> open DC state                                                  | [75,85,80] |
| R56                    | R60                                 | 5                  | R>C              | DC1    | Isomeric binding site of tryptophan -> open DC state                                                  | [75,85,80] |
|                        | S77                                 |                    |                  | DC1    | Phospho-site identified with mass spectrometry based (altered upon C-tail deletion or T668A mutation) | [52]       |
|                        |                                     |                    |                  |        | DCLK1 phospho-site identified in mass spectrometry based experiment                                   | [49]       |
| R76                    | R80                                 | 5                  | R>W 3x<br>R>Q 2x | DC1    | Isomeric binding site of DC1 domain (of DCX) to $\alpha\beta$ -tubulin                                | [73]       |
| R78                    | R82                                 |                    |                  | DC1    | Isomeric binding site of DC1 domain (of DCX) to $\alpha\beta$ -tubulin                                | [73]       |
|                        | S83                                 |                    |                  | DC1    | phospho-site identified with mass spectrometry based (altered upon C-tail deletion or T668A mutation) | [52]       |
| D81                    | E85                                 |                    |                  | DC1    | Isomeric binding site of DC1 domain (of DCX) to $\alpha\beta$ -tubulin                                | [73]       |
|                        | T92                                 | 1                  | T>P              | DC1    | Autophosphorylation site identified in mass spectrometry based experiment                             | [52]       |
|                        | T94                                 | 1                  | T>P              | DC1    | Autophosphorylation site identified in mass spectrometry based experiment                             | [52]       |

| Identified DCX residue | Identified or matched DCLK1 residue | Mutation frequency | Substitution | Domain | Function                                                                                              | Reference  |
|------------------------|-------------------------------------|--------------------|--------------|--------|-------------------------------------------------------------------------------------------------------|------------|
|                        | S96                                 |                    |              | DC1    | Phospho-site identified with mass spectrometry based (altered upon C-tail deletion or T668A mutation) | [52]       |
|                        |                                     |                    |              |        | Autophosphorylation site identified in mass spectrometry based experiment                             | [83]       |
| N94                    | N98                                 |                    |              | DC1    | Isomeric binding site of DC1 domain (of DCX) to $\alpha\beta$ -tubulin                                | [73]       |
| R102                   | R106                                |                    |              | DC1    | Isomeric binding site of DC1 domain (of DCX) to $\alpha\beta$ -tubulin                                | [73]       |
|                        | T107                                |                    |              | DC1    | Autophosphorylation site identified in mass spectrometry based experiment                             | [52]       |
|                        | S119                                |                    |              | DC1    | phospho-site identified with mass spectrometry based (altered upon C-tail deletion or T668A mutation) | [52]       |
| G122                   | G126                                |                    |              | DC1    | Isomeric binding site of tryptophan -> open DC state                                                  | [75,85,80] |
| E123                   | E127                                |                    |              | DC1    | Isomeric binding site of tryptophan -> open DC state                                                  | [75,85,80] |
| S124                   | S128                                | 1                  | S>R          | DC1    | Isomeric binding site of tryptophan -> open DC state                                                  | [75,85,80] |
|                        |                                     |                    |              | DC1    | Phospho-site identified with mass spectrometry based (altered upon C-tail deletion or T668A mutation) | [52]       |
| K134                   | K138                                | 2                  | K>N          | DC1    | Isomeric binding site of DC1 domain (of DCX) to $\alpha\beta$ -tubulin                                | [73]       |
|                        | T143                                |                    |              |        | Phospho-site identified with mass spectrometry based (altered upon C-tail deletion or T668A mutation) | [52]       |
| W146                   | W150                                |                    |              |        | Tryptophan responsible for the open/close confirmation of DC domains                                  | [75,85,80] |
|                        | S151                                |                    |              |        | Autophosphorylation site identified in mass spectrometry based experiment                             | [13,17,18] |
|                        | T156                                |                    |              |        | Autophosphorylation site identified in mass spectrometry based experiment                             | [18]       |
|                        | S158                                | 1                  | S>W          |        | Autophosphorylation site identified in mass spectrometry based experiment                             | [18]       |
|                        | S160                                |                    |              |        | Autophosphorylation site identified in mass spectrometry based experiment                             | [53,83,52] |
|                        | S164                                |                    |              |        | Autophosphorylation site identified in mass spectrometry based experiment                             | [53,83,52] |
|                        | S165                                |                    |              |        | Autophosphorylation site identified in mass spectrometry based experiment                             | [83]       |
|                        | T168                                |                    |              |        | Autophosphorylation site identified in mass spectrometry based experiment                             | [52]       |
|                        | S172                                |                    |              |        | Autophosphorylation site identified in mass spectrometry based experiment                             | [83]       |
|                        | S174                                |                    |              |        | Autophosphorylation site identified in mass spectrometry based experiment                             | [83]       |
|                        | T189                                |                    |              | DC2    | Phospho-site identified with mass spectrometry based (altered upon C-tail deletion or T668A mutation) | [52]       |
|                        | S193                                |                    |              | DC2    | Phospho-site identified with mass spectrometry based (altered upon C-tail deletion or T668A mutation) | [52]       |
| N200                   | N206                                |                    |              | DC2    | Isomeric binding site of DC2 domains (of DCX) to $\alpha\beta$ -tubulin                               | [73]       |
| T203                   | T209                                |                    |              | DC2    | Isomeric binding site of DC2 domains (of DCX) to $\alpha\beta$ -tubulin                               | [73]       |
| H205                   | H211                                |                    |              | DC2    | Isomeric binding site of DC2 domains (of DCX) to $\alpha\beta$ -tubulin                               | [73]       |

| Identified DCX residue | Identified or matched DCLK1 residue | Mutation frequency | Substitution     | Domain | Function                                                                                              | Reference |
|------------------------|-------------------------------------|--------------------|------------------|--------|-------------------------------------------------------------------------------------------------------|-----------|
| E208                   | E214                                |                    |                  | DC2    | Isomeric binding site of DC2 domains (of DCX) to $\alpha\beta$ -tubulin                               | [73]      |
| Q209                   | Q215                                | 1                  | Q>K              | DC2    | Isomeric binding site of DC2 domains (of DCX) to $\alpha\beta$ -tubulin                               | [73]      |
|                        | T218                                |                    |                  | DC2    | Phospho-site identified with mass spectrometry based (altered upon C-tail deletion or T668A mutation) | [52]      |
| K219                   | K225                                | 1                  | K>T              |        | KLET/KLDS hinge                                                                                       | [86]      |
| L220                   | L226                                |                    |                  |        | KLET/KLDS hinge                                                                                       | [86]      |
| E221                   | D227                                |                    |                  |        | KLET/KLDS hinge                                                                                       | [86]      |
| T222                   | S228                                |                    |                  | DC2    | KLET/KLDS hinge                                                                                       | [86]      |
|                        |                                     |                    |                  |        | Isomeric binding site of DC2 domains (of DCX) to $\alpha\beta$ -tubulin                               | [73]      |
|                        |                                     |                    |                  |        | Phospho-site identified with mass spectrometry based (altered upon C-tail deletion or T668A mutation) | [52]      |
| V224                   | V230                                |                    |                  | DC2    | Isomeric binding site of DC2 domains (of DCX) to $\alpha\beta$ -tubulin                               | [73]      |
|                        | T236                                | 3                  | T>A 1x<br>T>M 2x | DC2    | Autophosphorylation site identified in mass spectrometry based experiment * Full length specific      | [52]      |
|                        | S274                                |                    |                  | PEST   | Autophosphorylation site identified in mass spectrometry based experiment                             | [53,83]   |
| S297                   | S298                                |                    |                  | PEST   | Phospho-DCX by CDK5                                                                                   | [18]      |
|                        | S305                                | 1                  | S>G              | PEST   | DCLK1 phospho-site identified in mass spectrometry based experiment                                   | [49]      |
|                        | S307                                | 1                  |                  | PEST   | DCLK1 phospho-site identified in mass spectrometry based experiment                                   | [49]      |
|                        |                                     |                    |                  |        | Autophosphorylation site identified in mass spectrometry based experiment                             | [53]      |
|                        | T310                                |                    |                  | PEST   | DCLK1 phospho-site identified in mass spectrometry based experiment                                   | [49]      |
|                        | T311                                | 1                  | T>I              | PEST   | DCLK1 phospho-site identified in mass spectrometry based experiment                                   | [49]      |
|                        | S312                                |                    |                  | PEST   | Autophosphorylation site identified in mass spectrometry based experiment                             | [53]      |
|                        | S313                                |                    |                  | PEST   | DCLK1 phospho-site identified in mass spectrometry based experiment                                   | [49]      |
|                        |                                     |                    |                  |        | Autophosphorylation site identified in mass spectrometry based experiment                             | [53]      |
|                        | S320                                |                    |                  | PEST   | Autophosphorylation site identified in mass spectrometry based experiment                             | [53]      |
| T321                   | T324                                |                    |                  | PEST   | Phospho-DCX by JNK                                                                                    | [105]     |
|                        | S327                                |                    |                  | PEST   | DCLK1 phospho-site identified in mass spectrometry based experiment                                   | [49]      |
| S332                   | S330                                | 2                  | S>L              | PEST   | Phospho-DCX by JNK                                                                                    | [107]     |
|                        |                                     |                    |                  |        | DCLK1 phospho-site identified in mass spectrometry based experiment                                   | [49]      |
|                        | S332                                |                    |                  | PEST   | DCLK1 phospho-site identified in mass spectrometry based experiment                                   | [49,48]   |
| T331                   | S334                                | 1                  | S>L              | PEST   | Phospho-DCX by JNK                                                                                    | [105]     |
|                        |                                     |                    |                  |        | DCLK1 phospho-site identified in mass spectrometry based experiment                                   | [49]      |

| Identified DCX residue | Identified or matched DCLK1 residue | Mutation frequency | Substitution | Domain | Function                                                                  | Reference |
|------------------------|-------------------------------------|--------------------|--------------|--------|---------------------------------------------------------------------------|-----------|
|                        | T336                                |                    |              | PEST   | DCLK1 phospho-site identified in mass spectrometry based experiment       | [49,48]   |
|                        |                                     |                    |              |        | Autophosphorylation site identified in mass spectrometry based experiment | [53]      |
| S334                   | S337                                | 1                  | S>N          | PEST   | Phospho-DCX by JNK                                                        | [105]     |
|                        |                                     |                    |              |        | DCLK1 phospho-site identified in mass spectrometry based experiment       | [49,48]   |
|                        | S340                                |                    |              | PEST   | DCLK1 phospho-site identified in mass spectrometry based experiment       | [49]      |
|                        | S364                                |                    |              |        | DCLK1 phospho-site identified in mass spectrometry based experiment       | [48]      |
|                        | T395                                |                    |              | KD     | Autophosphorylation site identified in mass spectrometry based experiment | [83]      |
|                        | N400                                | 1                  | N>H          | KD     | Part of Glycine rich loop                                                 | [53]      |
|                        | V404                                |                    |              | KD     | Critical residue in C-spine / ATP binding                                 | [53]      |
|                        | A417                                |                    |              | KD     | Critical residue in C-spine                                               | [53]      |
|                        | K419                                |                    |              | KD     | ATP binding                                                               | [53]      |
|                        | E430                                | 1                  | E>K          | KD     | Part of $\alpha$ C-helix                                                  | [53]      |
|                        | E436                                |                    |              | KD     | ATP binding                                                               | [53]      |
|                        | S438                                |                    |              | KD     | Autophosphorylation site identified in mass spectrometry based experiment | [83]      |
|                        | L440                                |                    |              | KD     | Critical residue in R-spine                                               | [53]      |
|                        | V443                                | 1                  | V>L          | KD     | Part of $\alpha$ C-helix                                                  | [53]      |
|                        | L451                                |                    |              | KD     | Critical residue in R-spine                                               | [53]      |
|                        | L473                                |                    |              | KD     | Critical residue in C-spine                                               | [53]      |
|                        | D475                                | 1                  | D>N          | KD     | Involved in hinge region with AID domain                                  | [51]      |
|                        | I477                                | 1                  | I>T          | KD     | Involved in hinge region with AID domain                                  | [51]      |
|                        | M491                                |                    |              | KD     | Critical residue in C-spine                                               | [53]      |
|                        | H509                                |                    |              | KD     | HRD motif / Critical residue in R-spine                                   | [53]      |
|                        | R510                                |                    |              | KD     | HRD motif                                                                 | [53]      |
|                        | D511                                | 1                  | D>N          | KD     | HRD motif / D511N is kinase dead mutant                                   | [53]      |
|                        | L517                                |                    |              | KD     | Critical residue in C-spine                                               | [53]      |
|                        | V519                                |                    |              | KD     | Critical residue in C-spine                                               | [53]      |
|                        | D533                                |                    |              | KD     | DFG motif                                                                 | [53]      |
|                        | F534                                |                    |              | KD     | DFG motif / Critical residue in R-spine                                   | [53]      |
|                        | G535                                | 1                  | G>E          | KD     | DFG motif                                                                 | [53]      |
|                        | G542                                | 3                  | G>V 1x       | KD     | part of the activation loop                                               | [53]      |
|                        |                                     |                    | G>D 2x       |        |                                                                           |           |
|                        | T546                                |                    |              | KD     | Conserved phosphorylation-site in activation loop                         | [53]      |
|                        | P556                                | 1                  | P>A          | KD     | Part of the activation loop                                               | [53]      |



| Identified DCX residue | Identified or matched DCLK1 residue | Mutation frequency | Substitution | Domain | Function                                                                  | Reference |
|------------------------|-------------------------------------|--------------------|--------------|--------|---------------------------------------------------------------------------|-----------|
|                        | D569                                |                    |              | KD     | Critical residue in R-spine                                               | [53]      |
|                        | I576                                |                    |              | KD     | Critical residue in C-spine                                               | [53]      |
|                        | L580                                |                    |              | KD     | Critical residue in C-spine                                               | [53]      |
|                        | S637                                |                    |              | KD     | Autophosphorylation site identified in mass spectrometry based experiment | [53]      |
|                        | V661                                |                    |              | C-tail | Hydrophobic interaction of R1 with KD                                     | [51]      |
|                        | K664                                | 1                  | K>N          | C-tail | Part of R1 helix                                                          | [51]      |
|                        | I665                                |                    |              | C-tail | Hydrophobic interaction of R1 with KD                                     | [51]      |
|                        | K666                                | 1                  | K>N          | C-tail | Part of R1 helix                                                          | [51]      |
|                        | T668                                |                    |              | C-tail | Autophosphorylation-site for AID domain regulation                        | [52]      |
|                        | F669                                |                    |              | C-tail | Hydrophobic interaction of R1 with KD                                     | [51]      |
|                        | T678*                               |                    |              | C-tail | Autophosphorylation site identified in mass spectrometry based experiment | [53]      |
|                        | V682                                |                    |              | C-tail | Hydrophobic interaction of R2 with KD                                     | [51]      |
|                        | S683                                | 2                  | S>Y          | C-tail | Part of R2 helix                                                          | [51]      |
|                        | V684                                |                    |              | C-tail | Hydrophobic interaction of R2 with KD                                     | [51]      |
|                        | I685                                |                    |              | C-tail | Hydrophobic interaction of R2 with KD                                     | [51]      |
|                        | A686                                | 1                  | A>T          | C-tail | Part of R2 helix                                                          | [51]      |
|                        | K692                                |                    |              | C-tail | Key residue of R3 that forms salt bridges with D511 and D533              | [51]      |
|                        | T692*                               |                    |              | C-tail | Autophosphorylation site identified in mass spectrometry based experiment | [53]      |
|                        | R698                                |                    |              | C-tail | Hydrophilic interaction with KD                                           | [51]      |
|                        | R701                                |                    |              | C-tail | Hydrophilic interaction with KD                                           | [51]      |
|                        | S720                                |                    |              | C-tail | DCLK1 phospho-site identified in mass spectrometry based experiment       | [48]      |
|                        | S726                                |                    |              | C-tail | DCLK1 phospho-site identified in mass spectrometry based experiment       | [48]      |

**Table S3.** Predicted impact of point mutations on the structural stability of DCLK1. Predictions were performed using the DynaMut2 server [138] on mutations for which an experimental structure was available (either of DCX or DCLK1). The impact on stability was classified according to the change in Gibbs Free Energy ( $\Delta\Delta G^{\text{Stability}}$ ): neutral ( $-0.5 < \Delta\Delta G^{\text{Stability}} < 0.5$  kcal/mol), mildly destabilising ( $0.5 \leq \Delta\Delta G^{\text{Stability}} < 1$  kcal/mol), or destabilising ( $\Delta\Delta G^{\text{Stability}} \geq 1$  kcal/mol).

| Mutation | Domain            | PDB ID (Protein)          | Predicted stability change ( $\Delta\Delta G^{\text{Stability}}$ ) in kcal/mol | Predicted Impact     |
|----------|-------------------|---------------------------|--------------------------------------------------------------------------------|----------------------|
| T49M     | N-terminal region | 6REV (DCX-Tubulin, A45M)  | -0.7                                                                           | Mildly destabilising |
| V59A     | DC1               | 1MG4 (DCLK1)              | -2.41                                                                          | Destabilising        |
| R60C     | DC1               | 1MG4 (DCLK1)              | -1.78                                                                          | Destabilising        |
| G65A     | DC1               | 6REV (DCX-Tubulin, G61A)  | -0.21                                                                          | Neutral              |
| G65R     | DC1               | 6REV (DCX-Tubulin, G61R)  | -0.62                                                                          | Mildly destabilising |
| R67G     | DC1               | 1MG4 (DCLK1)              | -0.49                                                                          | Mildly destabilising |
| R67Q     | DC1               | 1MG4 (DCLK1)              | -0.38                                                                          | Neutral              |
| R80Q     | DC1               | 6REV (DCX-Tubulin, R76Q)  | -0.54                                                                          | Mildly destabilising |
| R80W     | DC1               | 6REV (DCX-Tubulin, R76W)  | -1.02                                                                          | Destabilising        |
| T92P     | DC1               | 6REV (DCX-Tubulin, T88P)  | -0.39                                                                          | Neutral              |
| R93Q     | DC1               | 6REV (DCX-Tubulin, R89N)  | -0.54                                                                          | Mildly destabilising |
| T94P     | DC1               | 6REV (DCX-Tubulin, S90P)  | -0.44                                                                          | Neutral              |
| S128R    | DC1               | 1MG4 (DCLK1)              | 0.42                                                                           | Neutral              |
| K138N    | DC1               | 6REV (DCX-Tubulin, K134N) | -0.31                                                                          | Neutral              |
| K144N    | DC1               | 1MG4 (DCLK1)              | 0.43                                                                           | Neutral              |
| K144R    | DC1               | 1MG4 (DCLK1)              | 0.1                                                                            | Neutral              |
| Q215K    | DC2               | 6RF2 (DCX-Tubulin, Q209K) | 0.23                                                                           | Neutral              |
| K225R    | DC2               | 6RF2 (DCX-Tubulin, K219R) | -0.07                                                                          | Neutral              |
| K225T    | DC2               | 6RF2 (DCX-Tubulin, K219R) | -0.38                                                                          | Neutral              |
| T236A    | DC2               | 5IP4 (DCX, T230A)         | -0.81                                                                          | Mildly destabilising |
| T236M    | DC2               | 5IP4 (DCX, T230M)         | 0.1                                                                            | Neutral              |
| N400H    | Kinase domain     | 5JZJ (DCLK1)              | -0.07                                                                          | Neutral              |
| E430K    | Kinase domain     | 5JZJ (DCLK1)              | 0.31                                                                           | Neutral              |
| V443L    | Kinase domain     | 5JZJ (DCLK1)              | -0.5                                                                           | Mildly destabilising |
| D475N    | Kinase domain     | 5JZJ (DCLK1)              | 0.05                                                                           | Neutral              |
| I477T    | Kinase domain     | 5JZJ (DCLK1)              | -2.82                                                                          | Destabilising        |
| D511N    | Kinase domain     | 5JZJ (DCLK1)              | -0.37                                                                          | Neutral              |
| G535E    | Kinase domain     | 5JZJ (DCLK1)              | -1.68                                                                          | Destabilising        |
| G542D    | Kinase domain     | 5JZJ (DCLK1)              | -0.27                                                                          | Neutral              |
| G542V    | Kinase domain     | 5JZJ (DCLK1)              | -1.33                                                                          | Destabilising        |
| P556A    | Kinase domain     | 5JZJ (DCLK1)              | -1.08                                                                          | Destabilising        |
| K664N    | C-tail            | 6KYQ (DCLK1)              | -1.54                                                                          | Destabilising        |
| K666N    | C-tail            | 6KYQ (DCLK1)              | -0.08                                                                          | Neutral              |
| P673H    | C-tail            | 6KYQ (DCLK1)              | -0.11                                                                          | Neutral              |
| S683Y    | C-tail            | 6KYQ (DCLK1)              | -0.99                                                                          | Destabilising        |
| A686T    | C-tail            | 6KYQ (DCLK1)              | -0.78                                                                          | Mildly destabilising |

## References

18. Tanaka, T.; Serneo, F.F.; Tseng, H.C.; Kulkarni, A.B.; Tsai, L.H.; Gleeson, J.G. Cdk5 Phosphorylation of Doublecortin Ser297 Regulates Its Effect on Neuronal Migration. *Neuron* **2004**, *41*, 215–227. [https://doi.org/10.1016/S0896-6273\(03\)00852-3](https://doi.org/10.1016/S0896-6273(03)00852-3).
20. Schaar, B.T.; Kinoshita, K.; McConnell, S.K. Doublecortin Microtubule Affinity Is Regulated by a Balance of Kinase and Phosphatase Activity at the Leading Edge of Migrating Neurons. *Neuron* **2004**, *41*, 203–213. [https://doi.org/10.1016/s0896-6273\(03\)00843-2](https://doi.org/10.1016/s0896-6273(03)00843-2).
48. Ferguson, F.M.; Nabet, B.; Raghavan, S.; Liu, Y.; Leggett, A.L.; Kuljanin, M.; Kalekar, R.L.; Yang, A.; He, S.; Wang, J.; et al. Discovery of a Selective Inhibitor of Doublecortin like Kinase 1. *Nat. Chem. Biol.* **2020**, *16*, 635–643. <https://doi.org/10.1038/s41589-020-0506-0>.
49. Liu, Y.; Ferguson, F.M.; Li, L.; Kuljanin, M.; Mills, C.E.; Subramanian, K.; Harshbarger, W.; Gondi, S.; Wang, J.; Sorger, P.K.; et al. Chemical Biology Toolkit for DCLK1 Reveals Connection to RNA Processing. *Cell Chem. Biol.* **2020**, *27*, 1229–1240.e4. <https://doi.org/10.1016/j.chembiol.2020.07.011>.
51. Cheng, L.; Yang, Z.; Guo, W.; Wu, C.; Liang, S.; Tong, A.; Cao, Z.; Thorne, R.F.; Yang, S.-Y.; Yu, Y.; et al. DCLK1 Autoinhibition and Activation in Tumorigenesis. *Innovation* **2022**, *3*, 100191. <https://doi.org/10.1016/j.xinn.2021.100191>.
52. Agulto, R.L.; Rogers, M.M.; Tan, T.C.; Ramkumar, A.; Downing, A.M.; Bodin, H.; Castro, J.; Nowakowski, D.W.; Ori-McKenney, K.M. Autoregulatory Control of Microtubule Binding in Doublecortin-like Kinase 1. *eLife* **2021**, *10*, e60126. <https://doi.org/10.7554/eLife.60126>.
53. Patel, O.; Dai, W.; Mentzel, M.; Griffin, M.D.W.; Serindoux, J.; Gay, Y.; Fischer, S.; Sterle, S.; Kropp, A.; Burns, C.J.; et al. Biochemical and Structural Insights into Doublecortin-like Kinase Domain 1. *Structure* **2016**, *24*, 1550–1531. <https://doi.org/10.1016/j.str.2016.07.008>.
54. Patel, O.; Roy, M.J.; Kropp, A.; Hardy, J.M.; Dai, W.; Lucet, I.S. Structural Basis for Small Molecule Targeting of Doublecortin Like Kinase 1 with DCLK1-IN-1. *Commun. Biol.* **2021**, *4*, 1105. <https://doi.org/10.1038/s42003-021-02631-y>.
70. Moslehi, M.; Ng, D.C.H.; Bogoyevitch, M.A. Doublecortin X (DCX) Serine 28 Phosphorylation Is a Regulatory Switch, Modulating Association of DCX with Microtubules and Actin Filaments. *Biochim. Biophys. Acta—Mol. Cell Res.* **2019**, *1866*, 638–649. <https://doi.org/10.1016/j.bbamcr.2019.01.003>.
73. Manka, S.W.; Moores, C.A. Pseudo-repeats in Doublecortin Make Distinct Mechanistic Contributions to Microtubule Regulation. *EMBO Rep.* **2020**, *21*, e51534. <https://doi.org/10.15252/embr.202051534>.
74. Liu, J.S.; Schubert, C.R.; Fu, X.; Fourniol, F.J.; Jaiswal, J.K.; Houdusse, A.; Stultz, C.M.; Moores, C.A.; Walsh, C.A. Molecular Basis for Specific Regulation of Neuronal Kinesin-3 Motors by Doublecortin Family Proteins. *Mol. Cell* **2012**, *47*, 707–721. <https://doi.org/10.1016/j.molcel.2012.06.025>.
75. Burger, D.; Stihle, M.; Sharma, A.; Di Lello, P.; Benz, J.; D’Arcy, B.; Debulpaep, M.; Fry, D.; Huber, W.; Kremer, T.; et al. Crystal Structures of the Human Doublecortin C- and N-Terminal Domains in Complex with Specific Antibodies. *J. Biol. Chem.* **2016**, *291*, 16292–16306, doi:10.1074/jbc.M116.726547.
80. Kim, M.H.; Cierpicki, T.; Derewenda, U.; Krowarsch, D.; Feng, Y.; Devedjiev, Y.; Dauter, Z.; Walsh, C.A.; Otlewski, J.; Bushweller, J.H.; et al. The DCX-Domain Tandems of Doublecortin and Doublecortin-like Kinase. *Nat. Struct. Biol.* **2003**, *10*, 324–333. <https://doi.org/10.1038/nsb918>.
83. Sugiyama, N.; Imamura, H.; Ishihama, Y. Large-Scale Discovery of Substrates of the Human Kinome. *Sci. Rep.* **2019**, *9*, 10503. <https://doi.org/10.1038/s41598-019-46385-4>.
85. Cierpicki, T.; Kim, M.H.; Cooper, D.R.; Derewenda, U.; Bushweller, J.H.; Derewenda, Z.S. The DC-Module of Doublecortin: Dynamics, Domain Boundaries, and Functional Implications. *Proteins Struct. Funct. Bioinform.* **2006**, *64*, 874–882. <https://doi.org/10.1002/prot.21068>.
86. Rufer, A.C.; Kuszniir, E.; Burger, D.; Stihle, M.; Ruf, A.; Rudolph, M.G. Domain Swap in the C-Terminal Ubiquitin-like Domain of Human Doublecortin. *Acta Crystallogr. Sect. D Struct. Biol.* **2018**, *74*, 450–462. <https://doi.org/10.1107/S2059798318004813>.
89. Graham, M.E.; Ruma-Haynes, P.; Capes-Davis, A.G.; Dunn, J.M.; Tan, T.C.; Valova, V.A.; Robinson, P.J.; Jeffrey, P.L. Multisite Phosphorylation of Doublecortin by Cyclin-Dependent Kinase 5. *Biochem. J.* **2004**, *381*, 471–481. <https://doi.org/10.1042/BJ20040324>.
95. Obenauer, J.C.; Cantley, L.C.; Yaffe, M.B. Scansite 2.0: Proteome-Wide Prediction of Cell Signaling Interactions Using Short Sequence Motifs. *Nucleic Acids Res.* **2003**, *31*, 3635–3641. <https://doi.org/10.1093/nar/gkg584>.
105. Gdalyahu, A.; Ghosh, I.; Levy, T.; Sapir, T.; Sapoznik, S.; Fishler, Y.; Azoulai, D.; Reiner, O. DCX, a New Mediator of the JNK Pathway. *EMBO J.* **2004**, *23*, 823–832. <https://doi.org/10.1038/sj.emboj.7600079>.
107. Jin, J.; Suzuki, H.; Hirai, S.; Mikoshiba, K.; Ohshima, T. JNK Phosphorylates Ser332 of Doublecortin and Regulates Its Function in Neurite Extension and Neuronal Migration. *Dev. Neurobiol.* **2010**, *70*, 929–942. <https://doi.org/10.1002/dneu.20833>.
115. Grossman, R.L.; Heath, A.P.; Ferretti, V.; Varmus, H.E.; Lowy, D.R.; Kibbe, W.A.; Staudt, L.M. Toward a Shared Vision for Cancer Genomic Data. *N. Engl. J. Med.* **2016**, *375*, 1109–1112. <https://doi.org/10.1056/NEJMp1607591>.
120. Liu, Z.-X.; Yu, K.; Dong, J.; Zhao, L.; Liu, Z.; Zhang, Q.; Li, S.; Du, Y.; Cheng, H. Precise Prediction of Calpain Cleavage Sites and Their Aberrance Caused by Mutations in Cancer. *Front. Genet.* **2019**, *10*, 715. <https://doi.org/10.3389/fgene.2019.00715>.
135. Kumar, M.; Michael, S.; Alvarado-Valverde, J.; Mészáros, B.; Sámano-Sánchez, H.; Zeke, A.; Dobson, L.; Lazar, T.; Örd, M.; Nagpal, A.; et al. The Eukaryotic Linear Motif Resource: 2022 Release. *Nucleic Acids Res.* **2022**, *50*, D497–D508, doi:10.1093/nar/gkab975.
136. Cook, A.D.; Manka, S.W.; Wang, S.; Moores, C.A.; Atherton, J. A Microtubule RELION-Based Pipeline for Cryo-EM Image Processing. *J. Struct. Biol.* **2020**, *209*, 107402, doi:10.1016/j.jsb.2019.10.004.
137. Jang, D.M.; Lim, H.J.; Hahn, H.; Lee, Y.; Kim, H.K.; Kim, H.S. Structural Basis of Inhibition of DCLK1 by Ruxolitinib. *Int. J. Mol. Sci.* **2021**, *22*, 8488, doi:10.3390/ijms22168488.
138. Rodrigues, C.H.M.; Pires, D.E.V.; Ascher, D.B. DynaMut2: Assessing Changes in Stability and Flexibility upon Single and Multiple Point Missense Mutations. *Protein Sci.* **2021**, *30*, 60–69, doi:10.1002/pro.3942.
